# Supplementary material for: Transport of Phage in Melon Plants and Inhibition of Progression of Bacterial Fruit Blotch
Source: MDPI journal article supplement (doi:10.3390/v12040477), 2020-04-23
Supplement: s1 [file s1]

## Supplementary Data

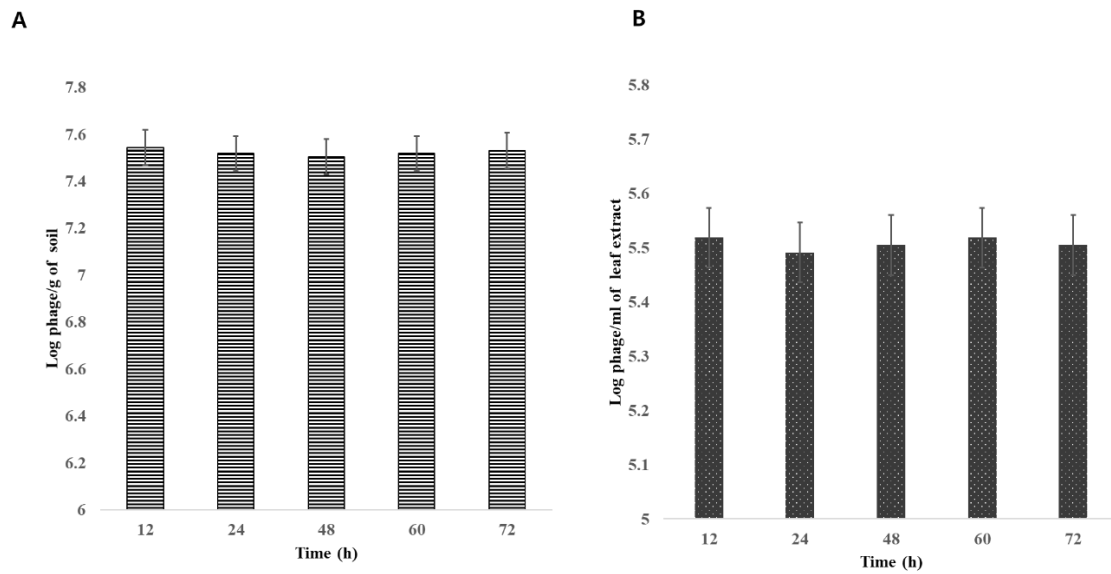

**Figure 1.** Stability of phage ACPHW in soil and melon extract. Phage ACPWH was added to soil at an initial titer of  $3.3 \times 10^7$  PFU/g soil (**A**) or  $3.3 \times 10^5$  PFU/mL melon extract (**B**) and titers were determined by plaque assay. The results are means of three replications; vertical lines are standard deviations.
